# Supplementary material for: Unique Tyr-heme double cross-links in F43Y/T67R myoglobin: an artificial enzyme with a peroxidase activity comparable to that of native peroxidases.
Source: Royal Society of Chemistry journal article supplement (doi:10.1039/c9cc02714a), 2019-06-11
Supplement: c9cc02714a1.pdf [file c9cc02714a1.pdf]

# Unique Tyr-heme double cross-links in F43Y/T67R myoglobin: an artificial enzyme with a peroxidase activity comparable to that of native peroxidases

Can Liu,<sup>‡<sup>a</sup></sup> Hong Yuan,<sup>‡<sup>b</sup></sup> Fei Liao,<sup>a</sup> Chuan-Wan Wei,<sup>a</sup> Ke-Jie Du,<sup>a</sup> Shu-Qin Gao,<sup>c</sup>  
Xiangshi Tan,<sup>b</sup> and Ying-Wu Lin<sup>a,c\*</sup>

## Supporting Information

### Contents

#### 1. Experimental Section

|                                                                                                                            |      |
|----------------------------------------------------------------------------------------------------------------------------|------|
| 1.1 <i>Protein preparation</i>                                                                                             | pS2  |
| 1.2 <i>UV-Vis spectroscopy</i>                                                                                             | pS2  |
| 1.3 <i>Mass spectrometry</i>                                                                                               | pS2  |
| 1.4 <i>X-ray crystallography</i>                                                                                           | pS3  |
| 1.5 <i>Acid titration studies</i>                                                                                          | pS3  |
| 1.6 <i>Stopped-flow spectroscopy</i>                                                                                       | pS4  |
| 1.7 <i>ITC studies</i>                                                                                                     | pS5  |
| <b>2. Fig. S1</b> UV-Vis spectra of F43Y/T67R Mb in different forms.                                                       | pS7  |
| <b>3. Fig. S2</b> MS spectra of F43Y/T67R Mb.                                                                              | pS8  |
| <b>4. Fig. S3</b> Structural overlay of F43Y/T67R Mb and WT Mb and F43Y Mb.                                                | pS9  |
| <b>5. Fig. S4</b> Structural overlay of F43Y/T67R Mb and HRP.                                                              | pS10 |
| <b>6. Fig. S5</b> UV-Vis spectra of F43Y Mb upon pH titration.                                                             | pS11 |
| <b>7. Fig. S6</b> ITC studies of ABTS binding to F43Y/T67R Mb and F43Y Mb.                                                 | pS12 |
| <b>8. Fig. S7</b> Stopped-flow UV-Vis spectra of F43Y/T67R Mb and F43Y Mb in reaction with H <sub>2</sub> O <sub>2</sub> . | pS13 |
| <b>9. Table 1</b> X-ray crystallography data collection and refinement statistics.                                         | pS14 |

## 1. Experimental Section

### 1.1 Protein preparation

Wild-type (WT) sperm whale Mb was expressed in BL21(DE3) cells using the Mb gene of pMbt7-7, and purified using the procedure described previously.<sup>1</sup> F43Y Mb was expressed and purified as reported in our previous study.<sup>2</sup> F43Y/T67R Mb gene was constructed using the QuikChange site directed mutagenesis kit (Stratagene), and the double mutations were confirmed by DNA sequencing assay. F43Y/T67R Mb was expressed and purified using a similar procedure as that for WT Mb and F43Y Mb.<sup>1,2</sup> Protein concentration was determined with an extinction coefficient of  $\epsilon_{404} = 150 \text{ mM}^{-1} \text{ cm}^{-1}$  for F43Y/T67R Mb mutant,  $\epsilon_{409} = 157 \text{ mM}^{-1} \text{ cm}^{-1}$  for WT Mb,<sup>1</sup> and  $\epsilon_{403} = 146 \text{ mM}^{-1} \text{ cm}^{-1}$  for F43Y Mb mutant, respectively, as calculated using the standard hemochromagen method.<sup>3</sup> Note that due to the saturation of one vinyl group of heme in F43Y Mb and F43Y/T67R Mb by Tyr-heme cross-link, the  $\alpha$ -band of pyridine spectrum shifted from 556 nm of WT Mb to 553 nm, the same as that of *c*-type heme with a single thioether bond,<sup>4</sup> which is between that of heme *b* (556 nm) and heme *c* (550 nm). Therefore, an average extinction coefficient of heme *b* and heme *c* was used to calculate that for the mutants.

### 1.2 UV-Vis spectroscopy

UV-Vis spectra were recorded on a Hewlett-Packard 8453 diode array spectrometer. Deoxy proteins were obtained by addition of a small amount of sodium dithionite. The pyridine hemochrome spectrum was obtained by using 8  $\mu\text{M}$  protein in 19 % (vol/vol) pyridine and 0.15 M NaOH, and the protein was reduced by a small amount of sodium dithionite.

### 1.3 Mass spectrometry

Protein mass spectrum measurement was carried out on an G2-XS QTOF mass spectrometry (Waters). The F43Y/T67R Mb sample was diluted with 0.1 M acetic

acid (pH 3.0) to  $\sim 20$   $\mu\text{M}$ . The protein solution was mixed with 1% formic acid, which was transferred into the mass spectrometer chamber for measurement under positive mode. The multiple  $m/z$  peaks were transformed to the protein molecular weight by using software MaxEnt1.

#### ***1.4 X-ray crystallography***

Ferric F43Y/T67R Mb in met form with a high purity ( $A_{404\text{nm}}/A_{280\text{nm}} > 4.0$ ) was exchanged into 20 mM potassium phosphate buffer (pH 7.0) and concentrated to  $\sim 4.0$  mM. The vapor diffusion hanging drop technique was used to crystallize the protein. The well buffer contained 0.2 M sodium acetate trihydrate, 0.1 M sodium cacodylate trihydrate pH 6.5, and 30% w/v polyethylene glycol 8,000 (Crystal screen, condition No. 28, Hampton Research). Crystal trays were set up by transferring 250  $\mu\text{L}$  of well buffer into each well. Then, 2  $\mu\text{L}$  of well buffer and 2  $\mu\text{L}$  of protein were mixed and placed on a siliconized glass slide. Crystallization can be achieved at 10  $^{\circ}\text{C}$  after  $\sim 2$  weeks. Diffractable crystals were soaked in a cryoprotectant solution of 30% PEG 400, mounted onto cryogenic loops, and frozen quickly in liquid nitrogen. Diffraction data was collected from a single crystal at Shanghai Synchrotron Radiation Facility (SSRF) BL17U beamline, China, using a MAR mosaic 225 CCD detector with a wavelength of 0.9793  $\text{\AA}$  at 100 K. The diffraction data were processed and scaled with HKL-2000<sup>5</sup>. The structure was solved by the molecular replacement method and the 1.6  $\text{\AA}$  structure of WT Mb (PDB entry 1JP6<sup>6</sup>) was used as the starting model. Manual adjustment of the model was carried out using the program COOT<sup>7</sup> and the models were refined by PHENIX<sup>8</sup> and Refmac<sup>5</sup><sup>9</sup>. Stereochemical quality of the structures was checked by using PROCHECK<sup>10</sup>. All of residues locate in the favored and allowed region and none in the disallowed region.

#### ***1.5 Acid titration studies***

Acid titration studies of F43Y/T67R Mb and F43Y Mb were recorded on a Hewlett-Packard 8453 diode array spectrometer at room temperature. The pH value of

the protein solution (10  $\mu\text{M}$ ) was adjusted by addition of a small amount of highly concentrated HCl (10 M), and measured directly in the cuvette using a microelectrode (type LE422) connected to a Mettler Toledo pH meter (type FE20). The  $\text{p}K_a$  values were calculated by fitting the absorbance of Soret band vs. pH to the Boltzmann function.

$$A = A_2 + (A_1 - A_2)/(1 + e^{(\text{pH}-\text{p}K_a)/\text{dpH}})$$

Here,  $A$  is the absorbance of Soret band;  $A_1$  and  $A_2$  are the initial and final absorbance of Soret band, respectively.

### 1.6 Stopped-flow spectroscopy

Effects of pH on the peroxidase activity of F43Y/T67R Mb, F43Y Mb and WT Mb were investigated on a stopped-flow spectrophotometer (SF-61DX2 Hi-Tech KinetAsyst<sup>TM</sup>) at 25 °C, by using 2,2'-azino-bis(3-ethylbenzothiazoline-6- sulfonic acid) diammonium salt (ABTS) as a substrate and  $\text{H}_2\text{O}_2$  as the oxidant, respectively. Typically, one syringe contains 2  $\mu\text{M}$  protein (in 100 mM potassium phosphate buffer, pH 4.5-7.0) in presence of 0.2 mM ABTS, and the second syringe contains 20 mM  $\text{H}_2\text{O}_2$ , as determined with  $\epsilon_{240\text{ nm}} = 39.4\text{ M}^{-1}\text{ cm}^{-1}$ . Upon mixing, the reaction was monitored by formation of the ABTS<sup>+</sup> cation radical at 660 nm. The initial rate was calculated based on the initial linear changes using an extinction coefficient of  $\epsilon_{660\text{ nm}} = 14.0\text{ mM}^{-1}\cdot\text{cm}^{-1}$ .<sup>11</sup>

The peroxidase activities were evaluated by using guaiacol or ABTS as a substrate. Typically, one syringe contains 2  $\mu\text{M}$  protein (F43Y/T67R Mb in 100 mM potassium phosphate buffer, pH 5.5; F43Y Mb in the same buffer, pH 5.3; WT Mb in the same buffer, pH 5.0) in presence of guaiacol or ABTS, respectively, and the second syringe contains 20 mM  $\text{H}_2\text{O}_2$ . The reaction using guaiacol as a substrate was followed by monitoring the change in absorbance of the product at 470 nm ( $\epsilon_{470\text{ nm}} = 26.6\text{ mM}^{-1}\cdot\text{cm}^{-1}$ ).<sup>12</sup> The initial rate was calculated based on the initial linear changes using an extinction coefficient, respectively. The curve of initial rates *versus* substrate concentrations was fitted to the Michaelis-Menten equation.

Kinetic studies of F43Y/T67R Mb and F43Y Mb in reaction with H<sub>2</sub>O<sub>2</sub> were performed with the same stopped-flow spectrophotometer. Typically, one syringe contains 20 μM protein (F43Y/T67R Mb in 100 mM potassium phosphate buffer, pH 5.5, and F43Y Mb in the same buffer, pH 5.3), and the second syringe contains various concentrations of H<sub>2</sub>O<sub>2</sub> (0.5-2 mM). The reaction was started with mixing of equal volume of solutions from the both syringes. 50 time-dependent spectra were collected over 0.5 sec from 300 to 700 nm at 20 °C. The changes of the Soret band were plotted, and the observed rate constants ( $k_{\text{obs}}$ , s<sup>-1</sup>) were calculated from single-exponential fits. The apparent rate constants ( $k_1$ , mM<sup>-1</sup>s<sup>-1</sup>) for compound II formation were obtained by linear regression fitting the plot of the observed rate constants,  $k_{\text{obs}}$ , versus the concentrations of H<sub>2</sub>O<sub>2</sub>.

$$k_{\text{obs}} = k_{\text{off}} + k_1[\text{H}_2\text{O}_2]$$

Here,  $k_{\text{off}}$  represents the dissociation rate constant of the Mb-H<sub>2</sub>O<sub>2</sub> complex.<sup>13</sup>

### 1.7 ITC studies

Isothermal titration calorimetry (ITC) measurements were performed on a Microcal VP-ITC microcalorimeter (GE life sciences). The protein solution was thoroughly degassed in a ThermoVal apparatus (Microcal). For titration experiments, ~1.42 mL of F43Y/T67R Mb or F43Y Mb (10 μM) solution was placed in the reaction cell, and a solution of ABTS (350 μM) was injected over 20 sec with a total of 25 injections (2 μL for the first injection and 10 μL for later injections), with a 150 sec interval between each injection. The reaction cell was continuously stirred at 502 rpm, and heat changes were recorded at 25 °C. The data were analyzed and the binding isotherm was fitted to a single-site model in the Origin 7.0 software.

### References:

- 1 J. A. Sigman, B. C. Kwok, Y. Lu, *J Am Chem Soc* **2000**, *122*, 8192-8196.
- 2 D.-J. Yan, W. Li, Y. Xiang, G.-B. Wen, Y.-W. Lin, X. Tan, *Chembiochem* **2015**, *16*, 47-50

- 3 E. A. Berry, B. L. Trumpower, *Anal Biochem* **1987**, *161*, 1-15.
- 4 P. D. Barker, J. C. Ferrer, M. Mylrajan, T. M. Loehr, R. Feng, Y. Konishi, W. D. Funk, R. T. A. MacGillivray, A. G. Mauk, *Proc. Natl. Acad. Sci. USA* **1993**, *90*, 6542-6546.
- 5 Z. Otwinowski and W. Minor, *Methods Enzymol.* **1997**, *276*: 307-326.
- 6 P. Urayama, G. N. Jr Phillips and S. M. Gruner, *Structure*, **2002**, *10*: 51-60.
- 7 P. Emsley and K. Cowtan, *Acta Crystallogr. Sect D*, **2004**, *60*: 2126-2132.
- 8 P. D. Adams, R. W. Grosse-Kunstleve, L. W. Hung, T. R. Ioerger, A. J. McCoy, N. W. Moriarty, R. J. Read, J. C. Sacchettini, N. K. Sauter and T. C. Terwilliger, *Acta Crystallogr. Sect D*, **2002**, *58*: 1948-1954.
- 9 G. N. Murshudov, A. A. Vagin and E. J. Dodson, *Acta Crystallogr. Sect D*, **1997**, *53*: 240-255.
- 10 R. A. Laskowski, M. W. MacArthur, D. S. Moss and J. M. Thornton, *J. Appl. Cryst.* **1993**, *26*: 283-291.
- 11 F. Natri, L. Lista, P. Ringhieri, R. Vitale, M. Faiella, C. Andreozzi, P. Travascio, O. Maglio, A. Lombardi, V. Pavone, *Chemistry*, **2011**, *17*: 4444-4453.
- 12 D. A. Baldwin, H. M. Marques, J. M. Pratt, *J Inorg Biochem*, **1987**, *30*: 203-217.
- 13 K. K. Khan, M. S. Mondal, L. Padhy and S. Mitra, *Eur J Biochem*, **1998**, *257*: 547-555.

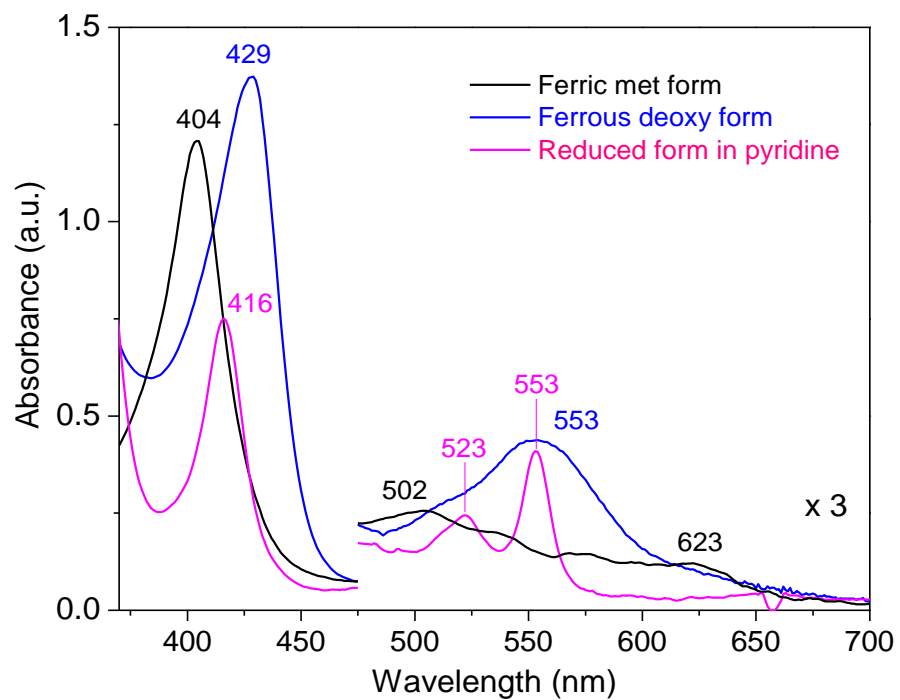

**Fig. S1** UV-Vis spectra of F43Y/T67R Mb in the ferric met form, ferrous doxy form, and reduced form in pyridine.

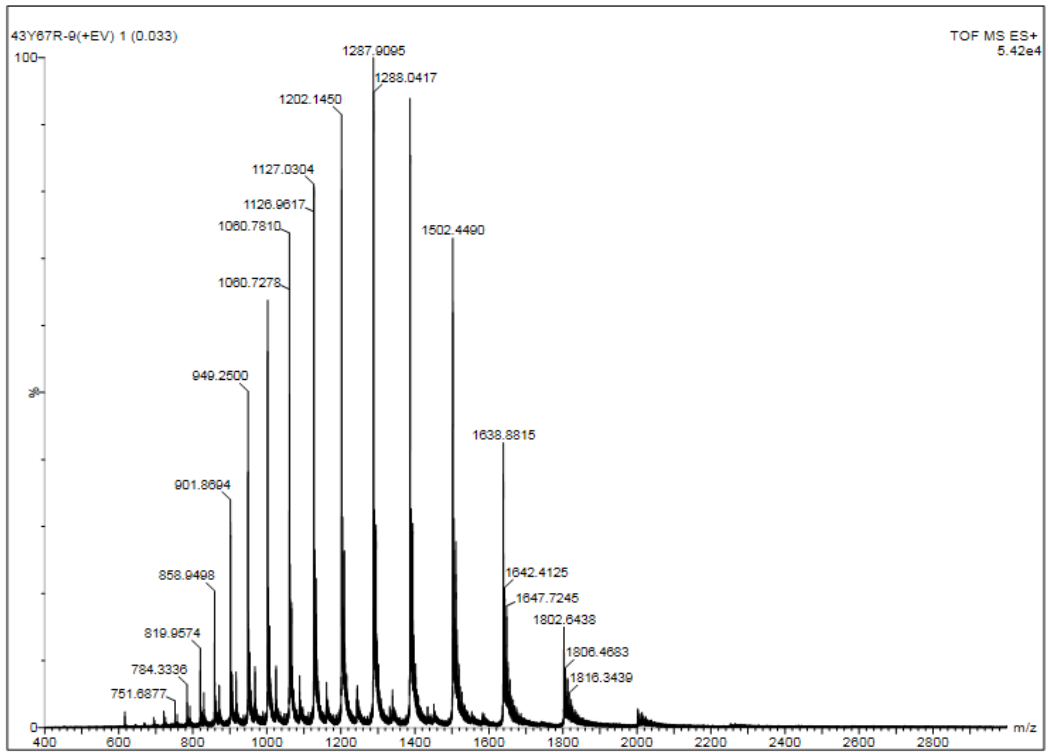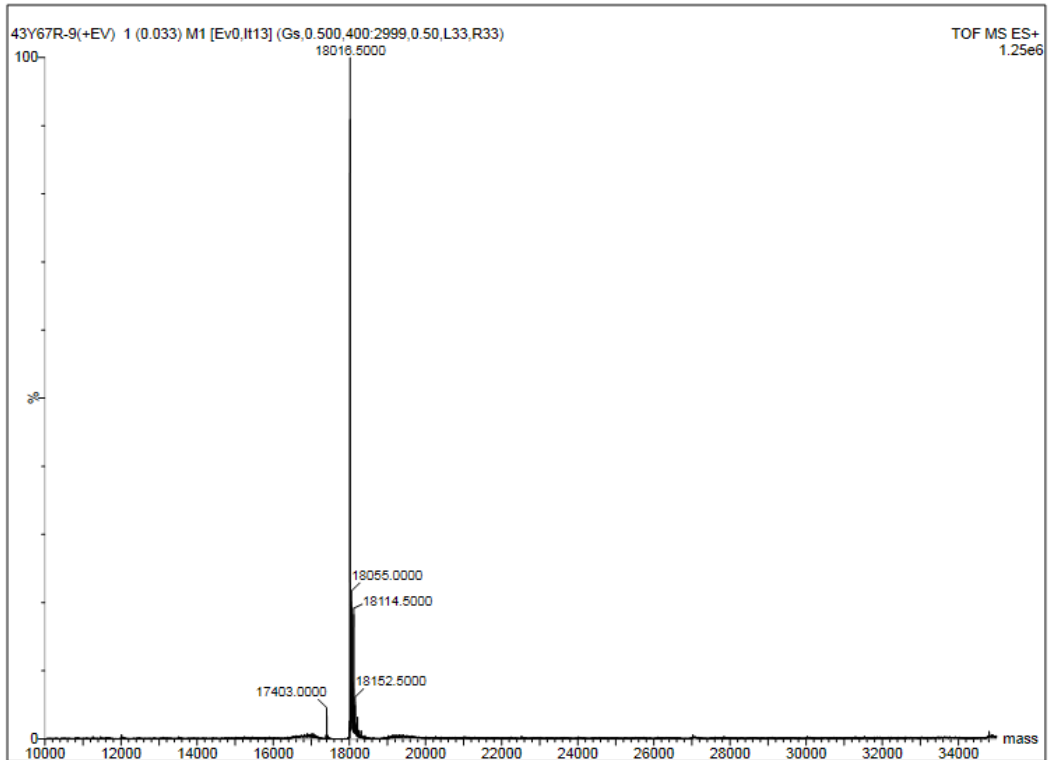

**Fig. S2** MS spectrum of F43Y/T67R Mb: Calculated molecular weight for the holo-protein, 18018 Da, and the observed,  $18016.5 \pm 0.5$  Da.



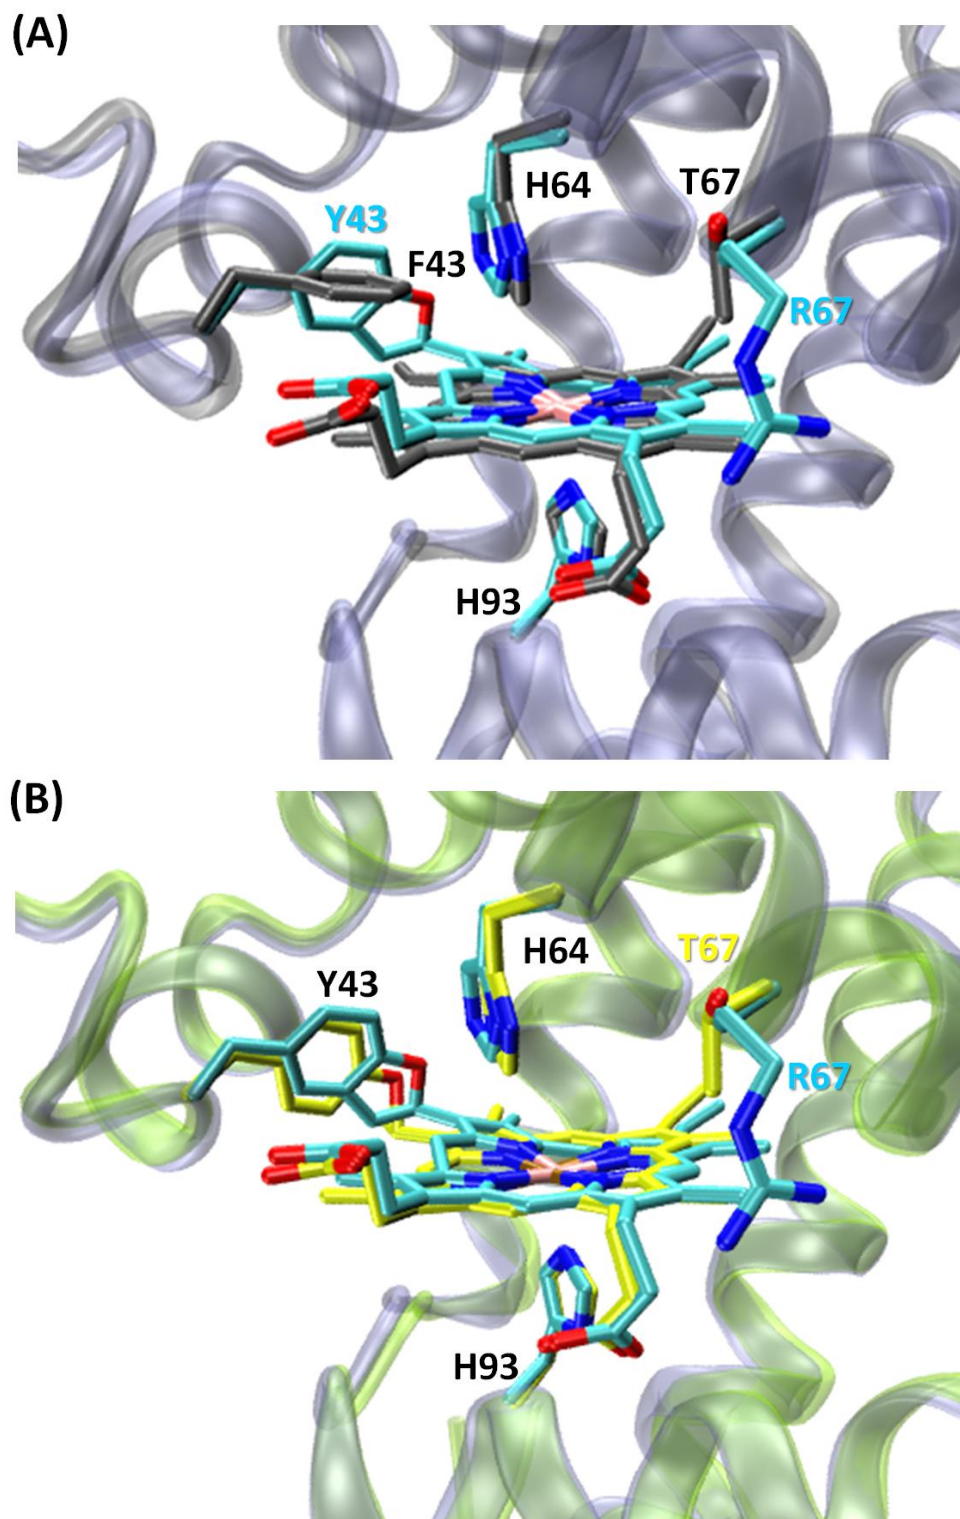

**Fig. S3** Structural overlay of F43Y/T67R Mb (cyan) with (A) WT Mb (PDB code 1JP6, gray), and (B) F43Y Mb (PDB code 4QAU, yellow), respectively, showing the heme active site.

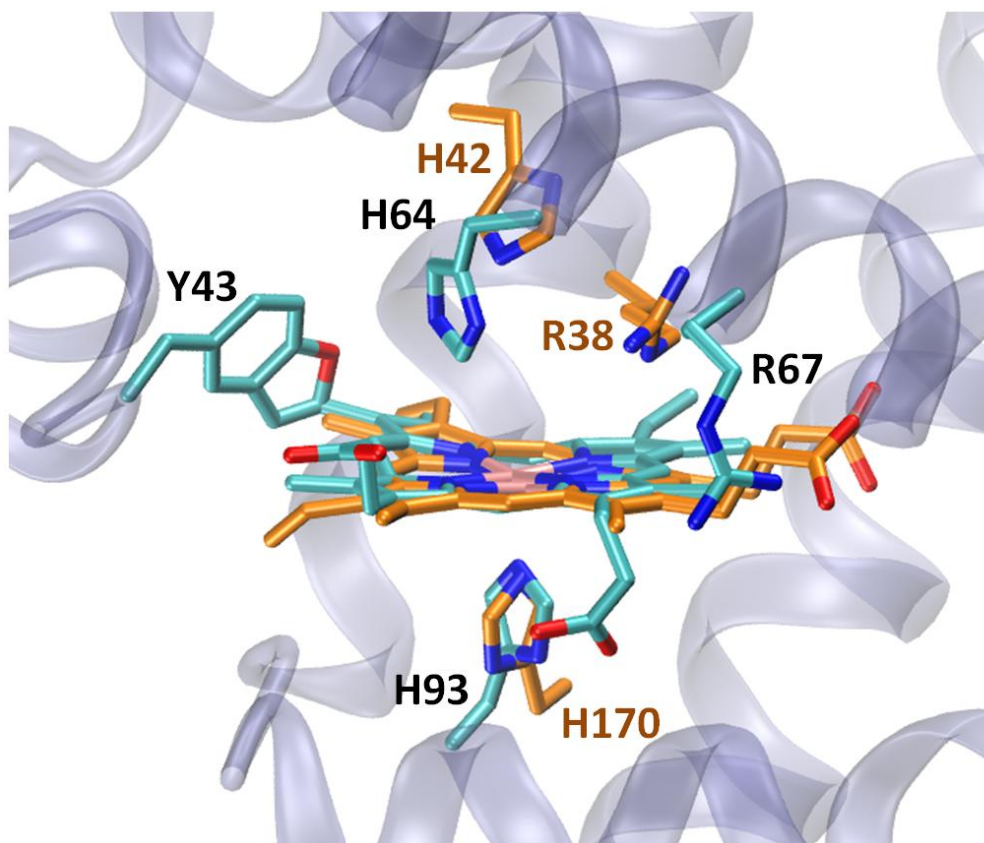

**Fig. S4** Structural overlay of F43Y/T67R Mb (cyan) and HRP (PDB code 1H58, orange), showing the heme active site.

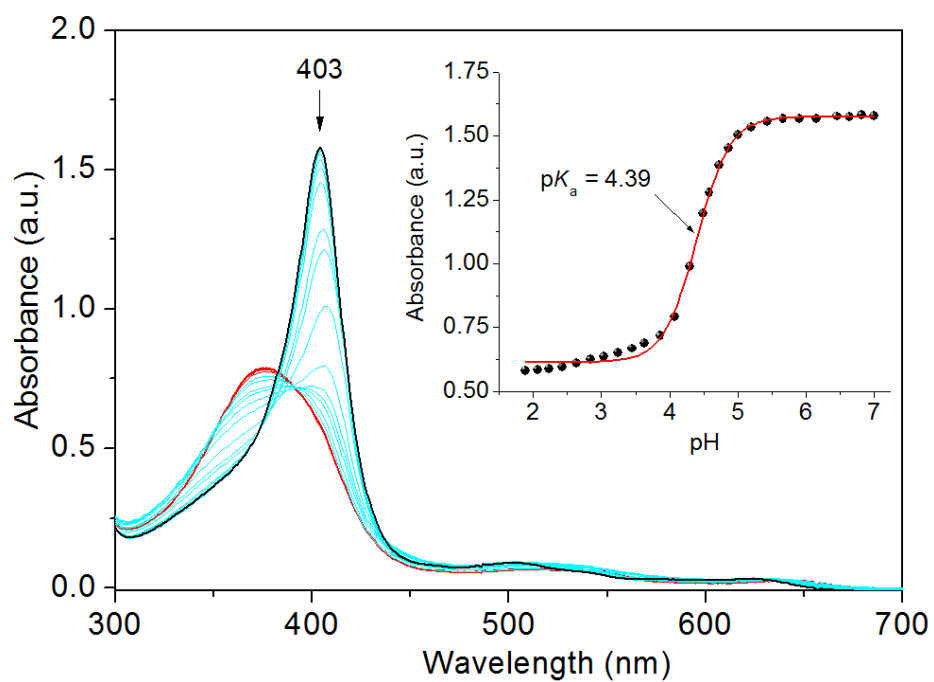

**Fig. S5** UV-visible spectra of F43Y Mb upon pH titration. Plot of the Soret band at 403 nm against pH values was shown as an inset.

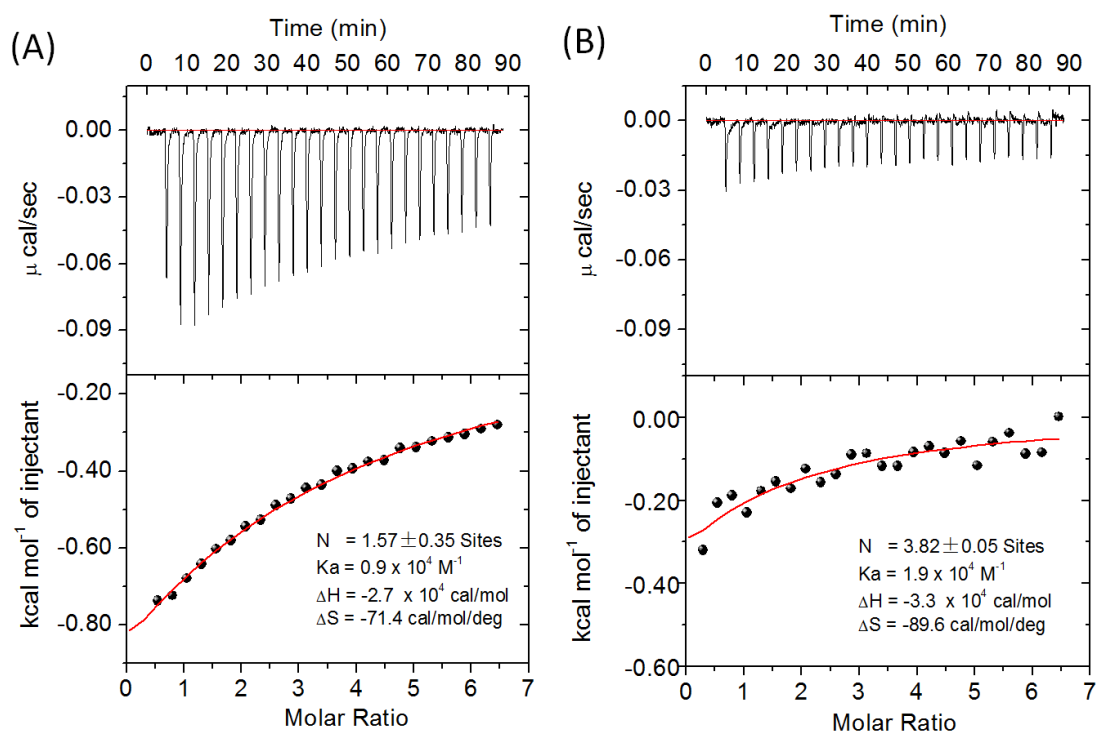

**Fig. S6** ITC data for titration of F43Y/T67R Mb (A) and F43Y Mb (B) (10  $\mu\text{M}$ ) with RB19 (350  $\mu\text{M}$ ) at 25  $^{\circ}\text{C}$ , pH 5.5. Top, raw data. Bottom, plot of integrated heats versus RB19/protein ratio.

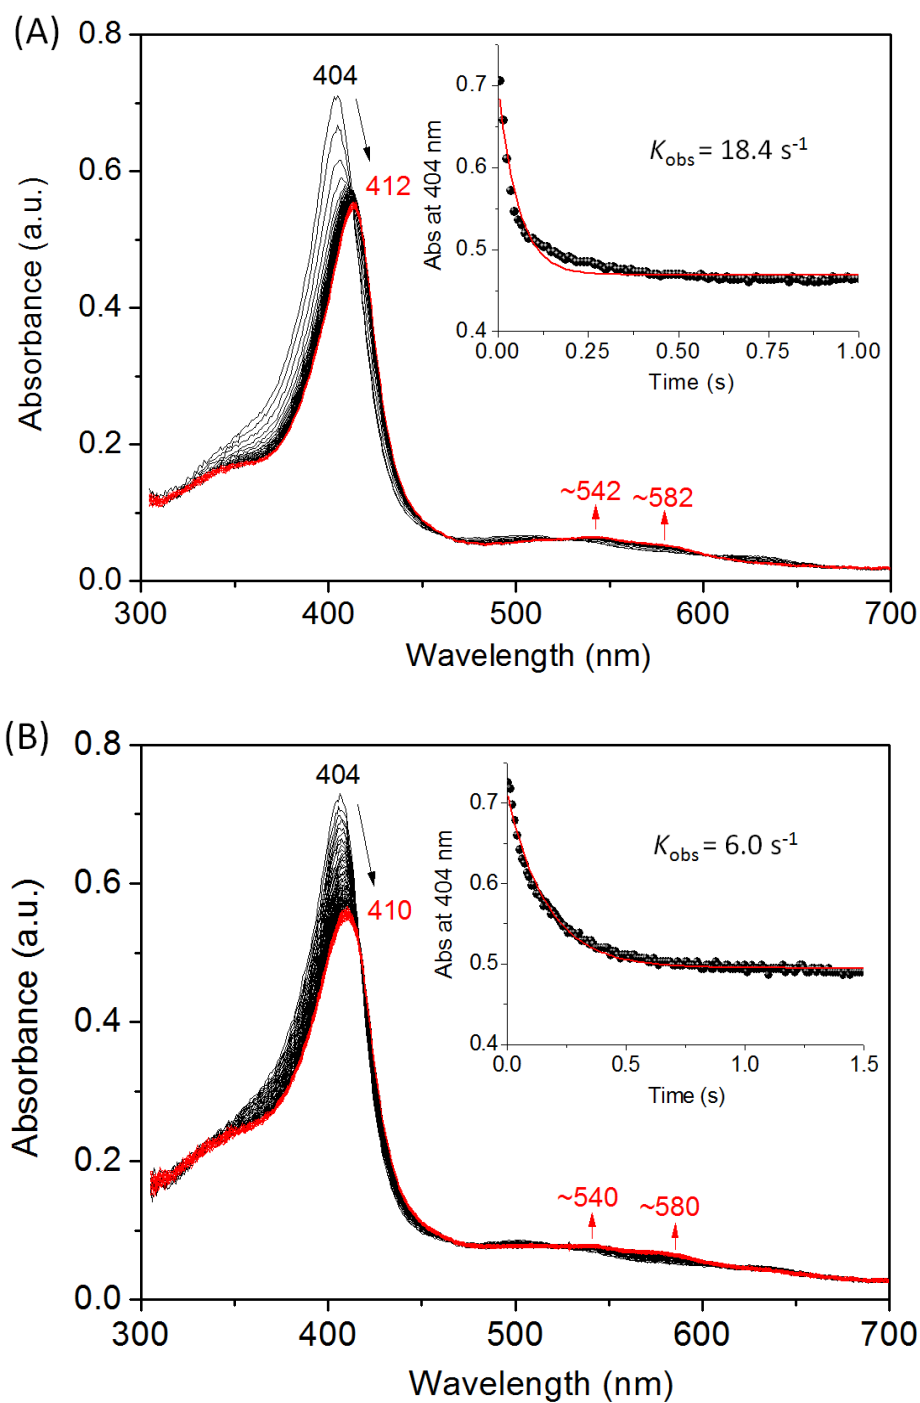

**Fig. S7** Stopped-flow UV-Vis spectra of F43Y/T67R Mb (A) and F43Y Mb (B) in reaction with  $\text{H}_2\text{O}_2$  (1 mM) for 0.5 s at pH 5.5 and pH 5.3, respectively, 20 °C. Inset, the single-exponential fit of the decay of Soret band at 404 nm.

**Table S1. Summary of data collection and refinement statistics**

| <b>F43Y/T67R Mb</b>                                                      |                                                                                       |
|--------------------------------------------------------------------------|---------------------------------------------------------------------------------------|
| Wavelength                                                               | 0.979                                                                                 |
| Space group                                                              | P 1 2 <sub>1</sub> 1                                                                  |
| Unit-cell dimensions (Å, °)                                              | $a = 72.406, b = 33.604, c = 72.886$ ;<br>$\alpha = 90, \beta = 117.873, \gamma = 90$ |
| Resolution (Å)                                                           | 50-1.99 (2.04-1.99)                                                                   |
| No. of observations                                                      | 156346                                                                                |
| No. of unique reflections                                                | 21592 (2736) <sup>[a]</sup>                                                           |
| Completeness (%)                                                         | 99.3 (94.3)                                                                           |
| $\langle I \rangle / \sigma (I)$                                         | 19.71 (2.59)                                                                          |
| Redundancy                                                               | 7.3 (6.4)                                                                             |
| $R_{\text{sym}}^{\text{[b]}}$                                            | 0.121 (0.892)                                                                         |
| $R_{\text{cryst}}^{\text{[c]}} (\%) / R_{\text{free}}^{\text{[d]}} (\%)$ | 0.171 / 0.220                                                                         |
| RMSD bonds (Å) / angles (°)                                              | 0.010 / 2.991                                                                         |
| Ramachandran plot, residues in:                                          |                                                                                       |
| Most favored regions (%)                                                 | 95.96                                                                                 |
| Allowed regions (%)                                                      | 4.04                                                                                  |
| Disallowed regions (%)                                                   | 0.0                                                                                   |

[a] Numbers in parentheses represent values in the highest resolution shell (Å).

[b]  $R_{\text{sym}} = \sum |I_j - \langle I \rangle| / \sum I_j$ , where  $I_j$  is the observed integrated intensity,  $\langle I \rangle$  is the average integrated intensity obtained from multiple measurements, and the summation is over all observed reflections.

[c]  $R_{\text{cryst}} = \sum ||F_{\text{obs}}| - |F_{\text{calc}}|| / \sum |F_{\text{obs}}|$ ,  $F_{\text{obs}}$  and  $F_{\text{calc}}$  are observed and calculated structure factor amplitudes, respectively.

[d]  $R_{\text{free}}$  calculated with randomly selected reflections (5%).
